# Supplementary material
Source: PubMed Central journal article supplement (PMC10158410)
Supplement: pg9-3-e172-s001.pdf [file pg9-3-e172-s001.pdf]

**Supplemental Table 1. Sizes of exosomes, microvesicles and particles in milk**

| <b>Vesicle/particle</b> | <b>Size range</b> |
|-------------------------|-------------------|
|                         | <i>nm</i>         |
| Exosomes                | 30 - 120          |
| Microvesicles           | 100 – 1,000       |
| Casein micelles         | 50 - 600          |
| Fat globules            | 100 – 15,000      |
