# Supplementary material
Source: PubMed Central journal article supplement (PMC10158410)
Supplement: pg9-3-e172-s002.pdf [file pg9-3-e172-s002.pdf]

**Supplemental Table 2. Exosome count, size and microRNA expression in previously frozen human milk from distinct lactational stages (n = 5)**

| Variable          | Lactational stage                     |                                       |                                       |
|-------------------|---------------------------------------|---------------------------------------|---------------------------------------|
|                   | Early                                 | Mid                                   | Late                                  |
| Exosomes/mL milk  | $2.0 \times 10^9 \pm 3.8 \times 10^9$ | $1.9 \times 10^9 \pm 2.4 \times 10^9$ | $5.6 \times 10^8 \pm 9.7 \times 10^8$ |
| Exosome size (nm) | $117 \pm 25.1$                        | $105 \pm 20.9$                        | $92 \pm 15.5$                         |
| miR-30d-5p (Ct)** | $28.7 \pm 0.7$                        | N.D. ( $29.4 \pm 1.0$ )               | N.D. ( $30.1 \pm 0.9$ )               |
| miR-125a-5p (Ct)  | $28.7 \pm 0.7$                        | N.D. ( $29.6 \pm 1.2$ )               | N.D. ( $31.8 \pm 0.5$ )               |
| miR-423-5p (Ct)   | N.D. ( $32.2 \pm 0.7$ )               | N. D. ( $31.4 \pm 1.5$ )              | N. D. ( $32.1 \pm 0.2$ )              |

\*\*Detection limit equals 29 PCR cycles under the conditions used here.

Abbreviations: Ct, cycle threshold; N.D., not detectable.
