# Supplementary material
Source: PubMed Central journal article supplement (PMC10158410)
Supplement: pg9-3-e172-s003.pdf [file pg9-3-e172-s003.pdf]

**Supplemental Table S3. One-way ANOVA analysis of exosome count and size from different lactational stages (n = 5)**

| Dependent Variable |      |       | Mean Difference | Std. Error | <i>p</i> | 95% Confidence Interval |             |
|--------------------|------|-------|-----------------|------------|----------|-------------------------|-------------|
|                    |      |       |                 |            |          | Lower Bound             | Upper Bound |
| Exosome size       | Late | Early | -25.14          | 13.19      | 0.14     | -58.15                  | 7.87        |
|                    | Mid  | Early | -12.64          | 13.19      | 0.55     | -45.65                  | 20.37       |
| Exosome count      | Late | Early | -1.48E+09       | 1.67E+09   | 0.594    | -5.66E+09               | 2.70E+09    |
|                    | Mid  | Early | -1.67E+08       | 1.67E+09   | 0.993    | -4.35E+09               | 4.01E+09    |

\**P* < 0.05 vs. early lactation.
