# Supplementary material
Source: PubMed Central journal article supplement (PMC10158410)
Supplement: pg9-3-e172-s004.pdf [file pg9-3-e172-s004.pdf]

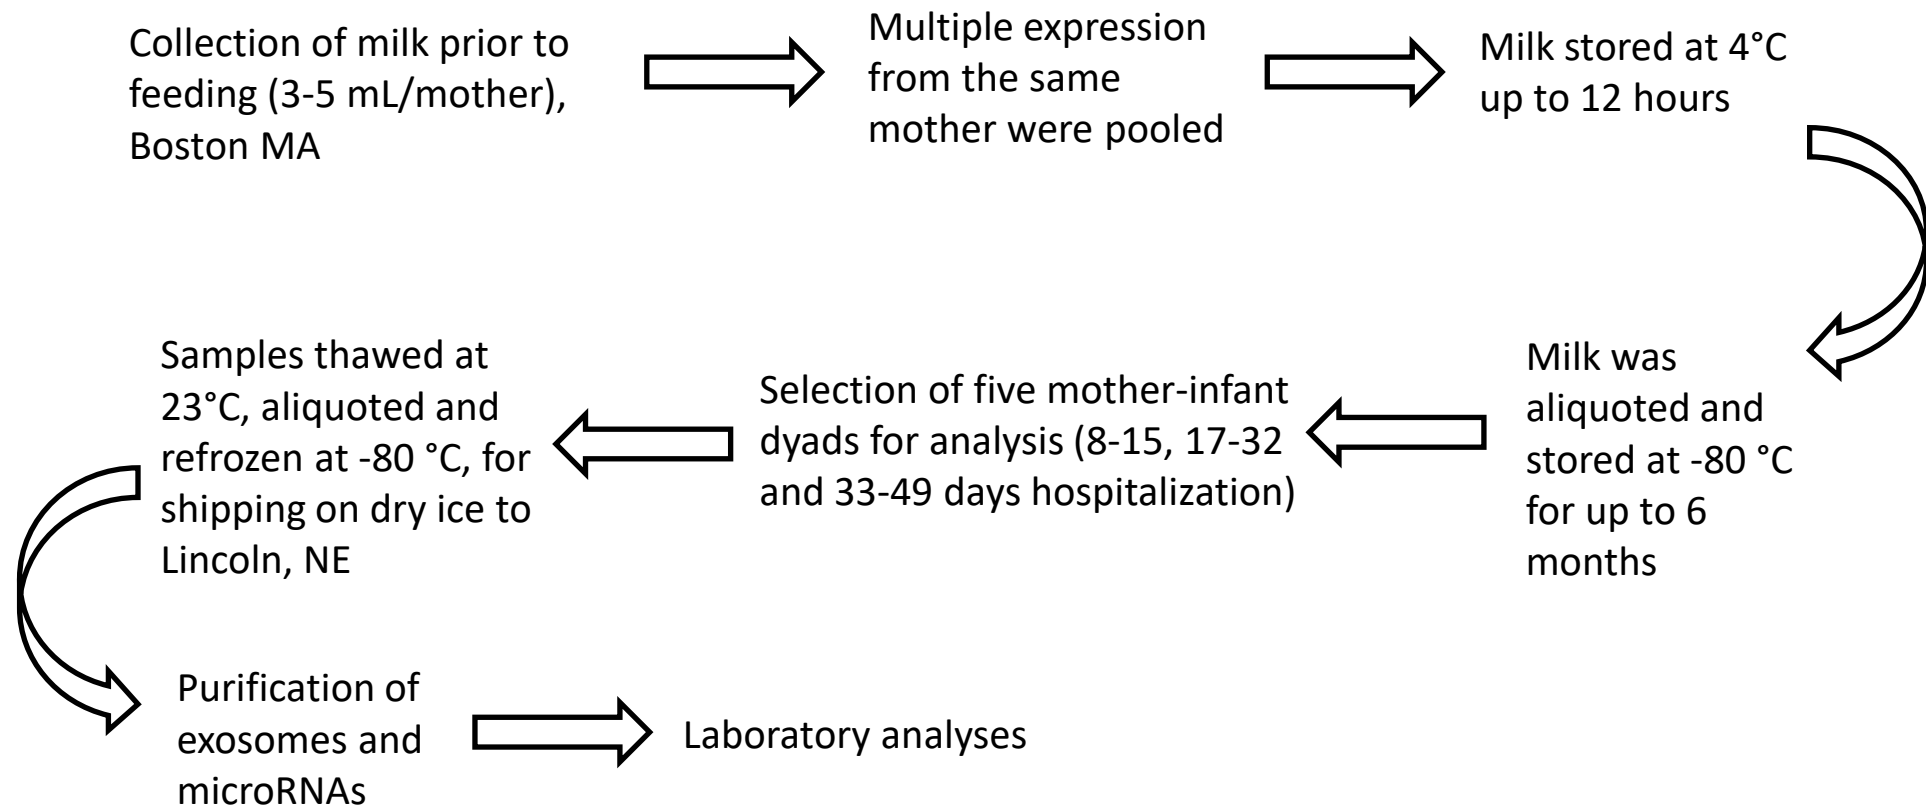

Fig. S1. Flow chart of human milk sample collection and process
