# Supplementary material
Source: PubMed Central journal article supplement (PMC10158410)
Supplement: pg9-3-e172-s005.pdf [file pg9-3-e172-s005.pdf]

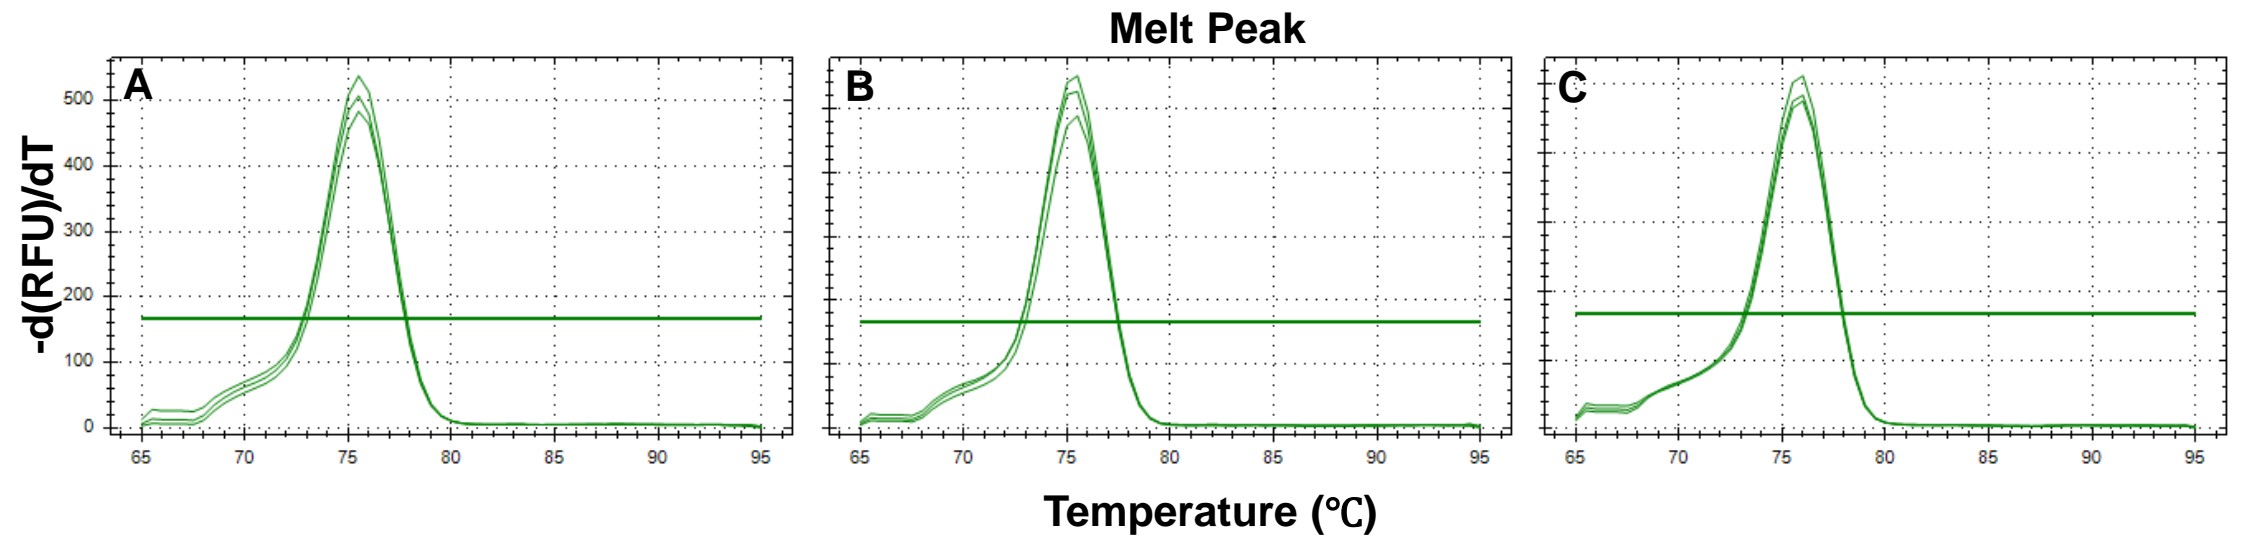

Fig. S2. Melting curves in qPCR analysis of miR-30d-5p (A), miR125a-5p (B) and miR-423-5p (C).
